Exams are available online only at [cme.psychiatryonline.org](http://cme.psychiatryonline.org)

## INFORMATION TO PARTICIPANTS

**OBJECTIVES.** After evaluating a specific journal article published in the American Journal of Psychiatry, participants should be able to demonstrate an increase in their knowledge of clinical medicine. Participants should be able to understand the contents of a selected research or review article and to apply the new findings to their clinical practice.

**PARTICIPANTS.** This program is designed for all psychiatrists in clinical practice, residents in Graduate Medical Education programs, medical students interested in psychiatry, and other physicians who wish to advance their current knowledge of clinical medicine.

**EXPLANATION OF HOW PHYSICIANS CAN PARTICIPATE AND EARN CREDIT.** In order to earn CME credit, subscribers should read through

the material presented in the article. After reading the article, complete the CME quiz online at [cme.psychiatryonline.org](http://cme.psychiatryonline.org) and submit your evaluation and study hours (up to 1 AMA PRA Category 1 Credit™).

**CREDITS.** The APA designates this educational activity for a maximum of 1 AMA PRA Category 1 Credit™. Physicians should only claim credit commensurate with the extent of their participation in the activity.

The American Psychiatric Association (APA) is accredited by the Accreditation Council for Continuing Medical Education (ACCME) to provide continuing medical education (CME) for physicians.

**Estimated Time to Complete: 1 Hour**

Begin date September 1, 2006 – End date August 31, 2008

## EXAMINATION QUESTIONS

Select the single best answer for each question below.

### SSRI-Associated Sexual Dysfunction

Richard Balon

Am J Psychiatry 2006; 163:1504-1509

**QUESTION 1.** Which of the following symptoms of sexual dysfunction has long been associated with depressive symptomatology?

- A. Decreased libido
- B. Priapism
- C. Delayed orgasm
- D. Dyspareunia

**QUESTION 2.** SSRIs are most commonly associated with which of the following sexual dysfunctions?

- A. Decreased libido
- B. Impaired erection
- C. Delayed ejaculation
- D. Postcoital headache

**QUESTION 3.** The only evidence-based management strategy for antidepressant-associated erectile dysfunction is which of the following?

- A. Reducing the dose of antidepressant
- B. Adding bupropion
- C. Introducing drug holidays
- D. Adding a phosphodiesterase-5 inhibitor

## EVALUATION QUESTIONS

*This evaluation form is adapted from the MedBiquitous Journal-Based Continuing Education Guidelines 28 November 2005.*

*This evaluation will appear online at the end of each CME course. Participants must complete this evaluation in order to receive credit. Select the response which best indicates your reaction to the following statements about this activity.*

**STATEMENT 1.** The activity achieved its stated objectives

- 1. Strongly agree
- 2. Agree
- 3. Neutral
- 4. Disagree
- 5. Strongly disagree

**STATEMENT 2.** The activity was relevant to my practice.

- 1. Strongly agree
- 2. Agree
- 3. Neutral
- 4. Disagree
- 5. Strongly disagree

**STATEMENT 3.** I plan to change my current practice based on what I learned in the activity.

- 1. Strongly agree
- 2. Agree
- 3. Neutral
- 4. Disagree
- 5. Strongly disagree

**STATEMENT 4.** The activity validated my current practice.

- 1. Strongly agree
- 2. Agree
- 3. Neutral
- 4. Disagree
- 5. Strongly disagree

**STATEMENT 5.** The activity provided sufficient scientific evidence to support the content presented.

- 1. Strongly agree
- 2. Agree
- 3. Neutral
- 4. Disagree
- 5. Strongly disagree

**STATEMENT 6.** The activity was free of commercial bias toward a particular product or company.

- 1. Strongly agree
- 2. Agree
- 3. Neutral
- 4. Disagree
- 5. Strongly disagree

Exams are available online only at [cme.psychiatryonline.org](http://cme.psychiatryonline.org)

## INFORMATION TO PARTICIPANTS

**OBJECTIVES.** After evaluating a specific journal article published in the American Journal of Psychiatry, participants should be able to demonstrate an increase in their knowledge of clinical medicine. Participants should be able to understand the contents of a selected research or review article and to apply the new findings to their clinical practice.

**PARTICIPANTS.** This program is designed for all psychiatrists in clinical practice, residents in Graduate Medical Education programs, medical students interested in psychiatry, and other physicians who wish to advance their current knowledge of clinical medicine.

**EXPLANATION OF HOW PHYSICIANS CAN PARTICIPATE AND EARN CREDIT.** In order to earn CME credit, subscribers should read through

the material presented in the article. After reading the article, complete the CME quiz online at [cme.psychiatryonline.org](http://cme.psychiatryonline.org) and submit your evaluation and study hours (up to 1 AMA PRA Category 1 Credit™).

**CREDITS.** The APA designates this educational activity for a maximum of 1 AMA PRA Category 1 Credit™. Physicians should only claim credit commensurate with the extent of their participation in the activity.

The American Psychiatric Association (APA) is accredited by the Accreditation Council for Continuing Medical Education (ACCME) to provide continuing medical education (CME) for physicians.

**Estimated Time to Complete: 1 Hour**  
Begin date September 1, 2006 – End date August 31, 2008

## EXAMINATION QUESTIONS

Select the single best answer for each question below.

### A Comparison of Lithium and T<sub>3</sub> Augmentation Following Two Failed Medication Treatments for Depression: A STAR\*D Report

Andrew A. Nierenberg et al.

Am J Psychiatry 2006; 163:1519-1530

**QUESTION 1.** Lithium compared with T<sub>3</sub> augmentation after two failed antidepressant treatments showed which of the following outcomes regarding remission rates?

- A. There was no statistically significant difference between lithium and T<sub>3</sub>.
- B. Lithium was associated with significantly greater remission rate than T<sub>3</sub>.
- C. T<sub>3</sub> was associated with significantly greater remission rate than lithium.
- D. Augmentation did not result in remission from depression with either drug.

**QUESTION 2.** Which of the following was observed in comparing side effects between lithium and T<sub>3</sub> augmentation?

- A. More participants withdrew from the study due to side effects with T<sub>3</sub>.
- B. A greater frequency of side effects was observed with lithium.
- C. The frequency of side effects was the same between T<sub>3</sub> and lithium.
- D. Side effect differences between agents were dependent on depression severity.

**QUESTION 3.** In this study of antidepressant augmentation, the median lithium blood level (meq/liter) among the subset of participants on lithium augmentation who were tested was:

- A. 0.4
- B. 0.8
- C. 0.6
- D. 1.0

## EVALUATION QUESTIONS

This evaluation form is adapted from the MedBiquitous Journal-Based Continuing Education Guidelines 28 November 2005. This evaluation will appear online at the end of each CME course. Participants must complete this evaluation in order to receive credit. Select the response which best indicates your reaction to the following statements about this activity.

**STATEMENT 1.** The activity achieved its stated objectives

- 1. Strongly agree
- 2. Agree
- 3. Neutral
- 4. Disagree
- 5. Strongly disagree

**STATEMENT 2.** The activity was relevant to my practice.

- 1. Strongly agree
- 2. Agree
- 3. Neutral
- 4. Disagree
- 5. Strongly disagree

**STATEMENT 3.** I plan to change my current practice based on what I learned in the activity.

- 1. Strongly agree
- 2. Agree
- 3. Neutral
- 4. Disagree
- 5. Strongly disagree

**STATEMENT 4.** The activity validated my current practice.

- 1. Strongly agree
- 2. Agree
- 3. Neutral
- 4. Disagree
- 5. Strongly disagree

**STATEMENT 5.** The activity provided sufficient scientific evidence to support the content presented.

- 1. Strongly agree
- 2. Agree
- 3. Neutral
- 4. Disagree
- 5. Strongly disagree

**STATEMENT 6.** The activity was free of commercial bias toward a particular product or company.

- 1. Strongly agree
- 2. Agree
- 3. Neutral
- 4. Disagree
- 5. Strongly disagree

Exams are available online only at [cme.psychiatryonline.org](http://cme.psychiatryonline.org)

## INFORMATION TO PARTICIPANTS

**OBJECTIVES.** After evaluating a specific journal article published in the American Journal of Psychiatry, participants should be able to demonstrate an increase in their knowledge of clinical medicine. Participants should be able to understand the contents of a selected research or review article and to apply the new findings to their clinical practice.

**PARTICIPANTS.** This program is designed for all psychiatrists in clinical practice, residents in Graduate Medical Education programs, medical students interested in psychiatry, and other physicians who wish to advance their current knowledge of clinical medicine.

**EXPLANATION OF HOW PHYSICIANS CAN PARTICIPATE AND EARN CREDIT.** In order to earn CME credit, subscribers should read through

the material presented in the article. After reading the article, complete the CME quiz online at [cme.psychiatryonline.org](http://cme.psychiatryonline.org) and submit your evaluation and study hours (up to 1 AMA PRA Category 1 Credit™).

**CREDITS.** The APA designates this educational activity for a maximum of 1 AMA PRA Category 1 Credit™. Physicians should only claim credit commensurate with the extent of their participation in the activity.

The American Psychiatric Association (APA) is accredited by the Accreditation Council for Continuing Medical Education (ACCME) to provide continuing medical education (CME) for physicians.

**Estimated Time to Complete: 1 Hour**  
Begin date September 1, 2006 – End date August 31, 2008

## EXAMINATION QUESTIONS

Select the single best answer for each question below.

### Tranlycypromine Versus Venlafaxine Plus Mirtazapine Following Three Failed Antidepressant Medication Trials for Depression: A STAR\*D Report

Patrick J. McGrath et al.

Am J Psychiatry 2006; 163:1531-1541

**QUESTION 1.** In the STAR\*D Level 4 study, the approximate overall rate of remission from treatments studied for patients who had not responded to, or were intolerant of, three previous antidepressant treatments was about:

- A. 2%
- B. 10%
- C. 40%
- D. 52%

**QUESTION 2.** In the STAR\*D Level 4 study, how did the tolerability of tranlycypromine and the combination of venlafaxine and mirtazapine compare?

- A. There was no difference in tolerability.
- B. Tranlycypromine was better tolerated than was the combination.
- C. The venlafaxine/mirtazapine combination was better tolerated.
- D. The study did not report differences in medication tolerability.

**QUESTION 3.** The STAR\*D Level 4 study suggested which of the following regarding treatment response and side effects between tranlycypromine and the combination of venlafaxine and mirtazapine?

- A. A higher rate of exiting treatment with tranlycypromine despite no difference in side effect frequency may reflect a greater level of discomfort in using MAOIs in clinical practice.
- B. Lack of response to previous treatment with venlafaxine predicted poor response to the combination of venlafaxine and mirtazapine.
- C. Response to tranlycypromine was better than the venlafaxine and mirtazapine combination in patients who exhibited atypical features.
- D. Neither the venlafaxine and mirtazapine combination nor tranlycypromine can be given safely in primary care settings.

## EVALUATION QUESTIONS

This evaluation form is adapted from the MedBiquitous Journal-Based Continuing Education Guidelines 28 November 2005. This evaluation will appear online at the end of each CME course. Participants must complete this evaluation in order to receive credit. Select the response which best indicates your reaction to the following statements about this activity.

**STATEMENT 1.** The activity achieved its stated objectives

- 1. Strongly agree
- 2. Agree
- 3. Neutral
- 4. Disagree
- 5. Strongly disagree

**STATEMENT 2.** The activity was relevant to my practice.

- 1. Strongly agree
- 2. Agree
- 3. Neutral
- 4. Disagree
- 5. Strongly disagree

**STATEMENT 3.** I plan to change my current practice based on what I learned in the activity.

- 1. Strongly agree
- 2. Agree
- 3. Neutral
- 4. Disagree
- 5. Strongly disagree

**STATEMENT 4.** The activity validated my current practice.

- 1. Strongly agree
- 2. Agree
- 3. Neutral
- 4. Disagree
- 5. Strongly disagree

**STATEMENT 5.** The activity provided sufficient scientific evidence to support the content presented.

- 1. Strongly agree
- 2. Agree
- 3. Neutral
- 4. Disagree
- 5. Strongly disagree

**STATEMENT 6.** The activity was free of commercial bias toward a particular product or company.

- 1. Strongly agree
- 2. Agree
- 3. Neutral
- 4. Disagree
- 5. Strongly disagree
