# THE AMERICAN JOURNAL OF PSYCHIATRY

## STAR\*D Algorithm

### LEVEL 1

INITIAL TREATMENT:  
citalopram

### LEVEL 2

SWITCH TO: bupropion  
(sustained-release), cognitive  
therapy, sertraline,  
venlafaxine (extended-  
release)

OR AUGMENT WITH:  
bupropion (sustained-  
release), buspirone, cognitive  
therapy

### LEVEL 2A

(only for those  
receiving cognitive  
therapy in Level 2)

SWITCH TO:  
bupropion  
(sustained-release)  
or venlafaxine  
(extended-release)

### LEVEL 3

SWITCH TO: mirtazapine or  
nortriptyline

OR AUGMENT WITH:  
lithium or triiodothyronine  
(only with bupropion  
[sustained-release],  
sertraline, venlafaxine  
[extended-release])

### LEVEL 4

SWITCH TO: tranylcypromine  
or mirtazapine combined  
with venlafaxine (extended-  
release)

## SSRI-Associated Sexual Dysfunction

Richard Balon

1504

## A Comparison of Lithium and T<sub>3</sub> Augmentation Following Two Failed Medication Treatments for Depression: A STAR\*D Report

Andrew A. Nierenberg et al.

1519

## Tranylcypromine Versus Venlafaxine Plus Mirtazapine Following Three Failed Antidepressant Medication Trials for Depression: A STAR\*D Report

Patrick J. McGrath et al.

1531

## Prevalence and Effects of Mood Disorders on Work Performance in a Nationally Representative Sample of U.S. Workers

Ronald C. Kessler et al.

1561

## Continuing Medical Education

1664

September 2006

Volume 163 • Number 9

Official Journal of the  
AMERICAN PSYCHIATRIC ASSOCIATION

[ajp.psychiatryonline.org](http://ajp.psychiatryonline.org)
