# THE AMERICAN JOURNAL OF PSYCHIATRY

## STAR\*D Algorithm

### LEVEL 1

INITIAL TREATMENT:  
citalopram

### LEVEL 2

SWITCH TO: bupropion  
(sustained-release), cognitive  
therapy, sertraline,  
venlafaxine (extended-  
release)

OR AUGMENT WITH:  
bupropion (sustained-  
release), buspirone, cognitive  
therapy

### LEVEL 2A

(only for those  
receiving cognitive  
therapy in Level 2)

SWITCH TO:  
bupropion  
(sustained-release)  
or venlafaxine  
(extended-release)

### LEVEL 3

SWITCH TO: mirtazapine or  
nortriptyline

OR AUGMENT WITH:  
lithium or triiodothyronine  
(only with bupropion  
[sustained-release],  
sertraline, venlafaxine  
[extended-release])

### LEVEL 4

SWITCH TO: tranylcypromine  
or mirtazapine combined  
with venlafaxine (extended-  
release)

### SSRI-Associated Sexual Dysfunction

Richard Balon

1504

### A Comparison of Lithium and T<sub>3</sub> Augmentation Following Two Failed Medication Treatments for Depression: A STAR\*D Report

Andrew A. Nierenberg et al.

1519

### Tranylcypromine Versus Venlafaxine Plus Mirtazapine Following Three Failed Antidepressant Medication Trials for Depression: A STAR\*D Report

Patrick J. McGrath et al.

1531

### Prevalence and Effects of Mood Disorders on Work Performance in a Nationally Representative Sample of U.S. Workers

Ronald C. Kessler et al.

1561

### Continuing Medical Education

1664

September 2006

Volume 163 • Number 9

Official Journal of the  
AMERICAN PSYCHIATRIC ASSOCIATION

[ajp.psychiatryonline.org](http://ajp.psychiatryonline.org)

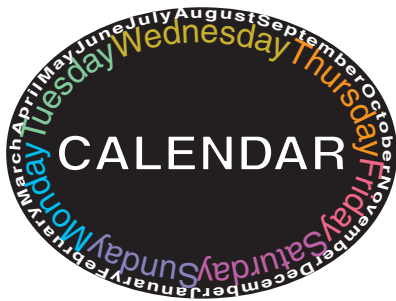

For free listing of your organization's official annual or regional meeting, please send us the following information: sponsor, location, inclusive dates, type and number of continuing education credits (if available), and the name, address, and telephone number of the person or group to contact for more information. In order for an event to appear in our listing, all notices and changes must be received at least 6 months in advance of the meeting and should be addressed to:

Calendar, American Journal of Psychiatry, 1000 Wilson Boulevard,  
Suite 1825, Arlington, VA 22209-3901, (703) 907-8572 (tel),  
jblair@psych.org (e-mail).

Because of space limitations, only listings of meetings of the greatest interest to Journal readers will be included.

## OCTOBER

**October 3–6**, International Early Psychosis Association conference: "Beyond the Crossroads," Birmingham, United Kingdom. Contact: Happenings Australia, (+61 3) 9866 6288 (tel), (+61 3) 9866 6313 (fax), event@happenings.com.au (e-mail), www.happenings.com.au (web site).

**October 5–8**, 58th Institute on Psychiatric Services, American Psychiatric Association, New York. Contact: Jill Gruber, APA Annual Meetings Dept., 1000 Wilson Blvd., Ste. 1825, Arlington, VA 22209; (703) 907-7815.

**October 6–8**, Clinical Neurology for Psychiatrists, New York, NY. Contact: Center for Continuing Medical Education, Montefiore Medical Center, 3301 Bainbridge Avenue, Bronx, NY 10467; (718) 920-6674 (tel), cme@montefiore.org (e-mail), www.cnfp.org (web site).

**October 13–15**, International Conference on Schizophrenia (ICONS II), Chennai, India. Contact: Dr. R. Thara, Schizophrenia Research Foundation (SCARF), R/7A, North Main Road, West Anna Nagar Extension, Chennai, India 600101; (044) 2615 3971 (tel), (044) 2615 1073 (fax), scarf@vsnl.com (e-mail), www.icons-scarf.org (web site)

**October 24–29**, 53rd Annual Meeting, American Academy of Child and Adolescent Psychiatry, San Diego. Contact: Anita Wiler, Assistant Director of Meetings, AACAP, 3615 Wisconsin Ave., N.W., Washington, DC 20016-3007; (202) 966-7300 Ext. 101 (tel), (202) 966-5894 (fax), meetings@aacap.org (e-mail), www.aacap.org (web site).

**October 27–28**, Translating Science to Practice and Policy: An Academic/Advocacy Partnership, Baltimore, MD. Contact: Johns Hopkins University School of Medicine, Office of Continuing Medical Education, Turner 20, 720 Rutland Ave., Baltimore, MD 21205; (410) 955-2959 (tel), (410) 955-0807 (fax), cmenet@jhmi.edu (e-mail); www.hopkinscme.net (web-site).

## NOVEMBER

**November 15–19**, 53rd Annual Meeting of Academy of Psychosomatic Medicine, Tucson, AZ. Contact: Executive Director, APM, 5272 River Road, Suite 630, Bethesda, MD 20816; (301) 718-6520 (tel), (301) 656-0989 (fax), apm@apm.org (e-mail), www.apm.org (web-site).

**November 17–19**, 2nd International Conference of SAARC Psychiatric Federation, Kathmandu, Nepal. Contact: Dr. Vidya Dev Sharma, Department of Psychiatry and Mental Health, IOM, Maharajgunj, Kathmandu, Nepal; 977-01-4420869 (tel), vdsharma@healthnet.org.np (e-mail), www.spf2.org.np (web site).

## DECEMBER

**December 2**, 3rd Annual Child and Adolescent Symposium, Tucson, AZ. Contact: Professional Development Office, University of Arizona College of Medicine, Department of Psychiatry, PO Box 245002, 1501 N Campbell, #7423, Tucson, AZ 85724-5002; (520) 626-1392 (tel), (520) 626-5732 (fax), uapsycon@email.arizona.edu (e-mail), www.psychiatry.arizona.edu (web site).

## JANUARY 2007

**January 13**, 6th Annual Women's Mental Health Symposium, Tucson, AZ. Contact: Professional Development Office, University of Arizona College of Medicine, Department of Psychiatry, PO Box 245002, 1501 N Campbell, #7423, Tucson, AZ 85724-5002; (520) 626-1392 (tel), (520) 626-5732 (fax), uapsycon@email.arizona.edu (e-mail), www.psychiatry.arizona.edu (web site).

## FEBRUARY

**February 17–20**, 18th Annual Meeting of American Neuropsychiatric Association,

Tucson, AZ. Contact: American Neuropsychiatric Association, 700 Ackerman Road, Suite 625, Columbus, Ohio 43202; (614) 447-2077 (tel) anpa@osu.edu (e-mail), www.anpaonline.org (web-site).

**February 19–23**, 16th Annual Psychopharmacology Review, Tucson, AZ. Contact: Professional Development Office, University of Arizona College of Medicine, Department of Psychiatry, PO Box 245002, 1501 N Campbell, #7423, Tucson, AZ 85724-5002; (520) 626-1392 (tel), (520) 626-5732 (fax), uapsycon@email.arizona.edu (e-mail), www.psychiatry.arizona.edu (web site).

**February 21–25**, annual meeting of the American College of Psychiatrists, Palm Springs, California. Contact: American College of Psychiatrists, 732 Addison St., Ste. B, Berkeley, CA 94710; (510) 704-8020 (tel), (510) 704-0113 (fax), Barbara@acpsych.org (e-mail).

## MARCH

**March 1–4**, 20th Annual Meeting of the American Association for Geriatric Psychiatry, New Orleans. Contact: AAGP, 7910 Woodmont Ave., Ste. 1050, Bethesda, MD 20814-3004; (301) 654-7850 (tel), (301) 654-4137 (fax), www.aagpmeeting.org (web site).

**March 17–21**, 15th European Congress of Psychiatry, Madrid. Contact: Kenes International – Global Congress Organisers and Association Management Services, 17 Rue du Cendrier, PO Box 1726, CH-1211 Geneva 1, Switzerland; (41) 22 908 0488 (tel), (41) 22 732 2850 (fax), aep2007@kenes.com (e-mail), www.kenes.com/aep2007 (web site).

## APRIL

**April 18–21**, 28th Annual Meeting and Scientific Sessions of the Society of Behavioral Medicine, Miami Beach. Contact: Society of Behavioral Medicine, 17000 Com-

Continued on page A40

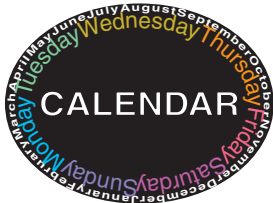

Continued from page A22

merce Parkway, Ste. C, Mount Laurel, NJ 08054; (856) 439-1297 (tel), (856) 439-0525 (fax), info@sbm.org (e-mail).

## MAY

**May 17–20**, The 51st Annual Meeting of the American Academy of Psychoanalysis and Dynamic Psychiatry, San Diego. Contact: Executive Office, American Academy of Psychoanalysis and Dynamic Psychiatry, P. O. Box 30, Bloomfield, CT 06002; (888) 691-8281 (tel), (888) 286-0787 (fax), aap@ssmgt.com (e-mail), www.aapdp.org (web site).

**May 19–24**, 160th Annual Meeting of the American Psychiatric Association, San Diego. Contact: Cathy Nash, APA Annual Meetings Dept., 1000 Wilson Blvd., Ste. 1825, Arlington, VA 22209; (703) 907-7822.

## CONTENTS (Continued from page A5)

### Book Forum

1650  
1654 Books Received

### APA Official Actions

1655 Reports to the Membership

### Other Items of Interest

1664 Continuing Medical Education  
A15 Officers of the American Psychiatric Association  
A22 Calendar  
A48 How to Activate Your Online Subscription  
A55 *Psychological Medicine* contents (August 2006)  
A62 *The British Journal of Psychiatry* contents (August 2006)  
A70 Index to Advertisers

### Cover

Two new two reports from the Sequenced Treatment Alternatives to Relieve Depression (STAR\*D) project appear in this issue. In the Level 3 augmentation trial, patients who had not benefited adequately from at least two previous medication trials augmented their current antidepressant with lithium or T<sub>3</sub>. Nierenberg et al. (p. 1519) report that although remission and response rates were modest and not significantly different between the two, they were higher with T<sub>3</sub>, which was better tolerated than lithium. In the Level 4 trial, patients who had not obtained relief in Level 3 switched either to tranylcypromine or combination treatment with extended-release venlafaxine and mirtazapine. As McGrath et al. report (p. 1531), remission and response rates were modest here too, although the combination treatment was better tolerated and produced greater improvements in symptoms than tranylcypromine. Cover design by Jason Glance.

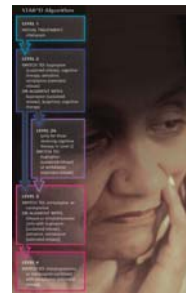

## Coming in the October 2006 issue

### THE AMERICAN JOURNAL OF PSYCHIATRY

#### *Diagnosing Adult ADHD: Are Late Onset and Subthreshold Diagnoses Valid?*

S.V. Faraone, J. Biederman, T. Spencer, E. Mick, K. Murray, C. Petty, J.J. Adamson, and M.C. Monuteaux

#### *Impact Of Psychometrically-Defined Executive Function Deficits In Adults with ADHD*

J. Biederman, C. Petty, R. Fried, J. Fontanella, A. Doyle, L. Seidman, and S.V. Faraone

#### *Analysis of the Patient-Therapist Relationship in Dynamic Psychotherapy: An Experimental Study of Transference Interpretations*

P.A. Høglend, S. Amlo, A. Marble, K-P. Bøgwald, Ø. Sørby, M.C. Sjaastad, and O. Heyerdahl

#### *Brain Dopamine D1 Receptors in Twins Discordant for Schizophrenia*

J. Hirvonen, T.G.M. van Erp, J. Huttunen, S. Aalto, K. Någren, M. Huttunen, J. Lönnqvist, J. Kaprio, C.D. Tyrone, and J. Hietala

#### *Polarity at Onset is a Familial Feature of Bipolar Affective Disorder*

L. Kassem, V.A. Lopez, D. Hedeker, J. Steele, and The NIMH Genetics Initiative Bipolar Disorder Consortium



# THE AMERICAN JOURNAL OF PSYCHIATRY

Official Journal of the American Psychiatric Association

## Instructions for Activating Your Online Subscription

All subscribers to the print edition of *The American Journal of Psychiatry* are automatically eligible to view the *Journal* online. The online version of the *Journal* allows you to conduct searches for topics of interest in issues going all the way back to 1844. Plus the only way readers can participate in the *Journal's* new CME Course program is to have an activated online subscription (note: there is an additional annual fee to be enrolled and eligible to receive up to 36 hours of category 1 CME credit).

To activate your online subscription:

Make sure you have your customer identification number available. This number is printed on your *Journal* mailing label, directly above your name and address. If you cannot locate this number, please contact American Psychiatric Publishing, Inc., through one of the following methods:

- e-mail: [accessnumber@psych.org](mailto:accessnumber@psych.org)
- phone: (800) 368-5777
- fax: (703) 907-1091
- mail:

American Psychiatric Publishing, Inc.  
1000 Wilson Blvd., Suite 1825  
Arlington, VA 22209-3901  
Attn: Circulation Department.

Internet: <http://www.psychiatryonline.org>. Click on the "Subscriptions" button located near the bottom of the page. Then click on the appropriate link:

- ACTIVATE Your Member or Individual (Nonmember) Subscription

For APA Members, you will find your member number on the mailing label above your name. It is

a 10-digit number beginning with zeros. Enter your number in the box and click the SUBMIT button.

For Individual Nonmembers and Institutions, your customer number is on the mailing label above your name. It is a 10-digit number beginning with 22 or 30. Enter this number in the box and click the SUBMIT button.

Fill out all the information on the next screen and press the "Send Form" button at the bottom on the right.

When finished, click the "Done" button. You will receive an e-mail confirmation that your subscription has been activated.

**Continuing Medical Education:** You now have an opportunity to earn CME credits by reading articles in *The American Journal of Psychiatry*. Three articles in each issue will each comprise a short course for up to 1 hour category 1 CME credit each. The course comprises reading the article and answering three multiple-choice questions with a single correct answer. CME Credit is issued only online. Readers who want credit must subscribe to the AJP Continuing Medical Education Course program (APA Members: \$97.00 per year; Nonmember subscribers: \$144.00 per year; nonmember nonsubscribers: \$180.00 per year). Go to [cme.psychiatryonline.org](http://cme.psychiatryonline.org), select *The American Journal of Psychiatry* at that site, take the course(s) of your choosing, complete the evaluation form, and submit your answers for CME credit. In the online course, correct answers will be highlighted for your reference; there is no minimum threshold score necessary for the credit. A link from the question to the correct answer in context will be highlighted in the associated article. A certificate for each course will be generated upon successful completion.

The American Journal of Psychiatry is online at [ajp.psychiatryonline.org](http://ajp.psychiatryonline.org)



# Psychological Medicine

Volume 36 Number 8 August 2006

## CONTENTS

---

|                                                                                                                                                                                                                           |      |                                                                                                                                                                                                                                                            |      |
|---------------------------------------------------------------------------------------------------------------------------------------------------------------------------------------------------------------------------|------|------------------------------------------------------------------------------------------------------------------------------------------------------------------------------------------------------------------------------------------------------------|------|
| In this Issue                                                                                                                                                                                                             | 1051 | <b>Cognitive function in unaffected twins discordant for affective disorder</b> CHRISTENSEN, M.V., KYVIK, K.O., AND KESSING, L.V.                                                                                                                          | 1119 |
| <b>REVIEW ARTICLES</b>                                                                                                                                                                                                    |      | <b>Assessing personality traits associated with depression: the utility of a tiered model</b> PARKER, G., MANICAVASAGAR, V., CRAWFORD, J., TULLY, L., AND GLADSTONE, G.                                                                                    | 1131 |
| <b>Cognitive reserve in neuropsychiatry</b> BARNETT, J.H., SALMOND, C.H., JONES, P.B., AND SAHAKIAN, B.J.                                                                                                                 | 1053 | <b>A controlled longitudinal 5-year follow-up study of children at high and low risk for panic disorder and major depression</b> BIEDERMAN, J., PETTY, C., HIRSHFELD-BECKER, D.R., HENIN, A., FARAONE, S.V., DANG, D., JAKUBOWSKI, A., AND ROSENBAUM, J.F. | 1141 |
| <b>Brain reserve and cognitive decline: a non-parametric systematic review</b> VALENZUELA, M.J., AND SACHDEV, P.                                                                                                          | 1065 | <b>The temporal relationship of the onsets of alcohol dependence and major depression: using a genetically informative study design</b> KUO, P.-H., GARDNER, C.O., KENDLER, K., AND PRESCOTT, C.A.                                                         | 1153 |
| <b>ORIGINAL ARTICLES</b>                                                                                                                                                                                                  |      | <b>The influence of emotions on inhibitory functioning in borderline personality disorder</b> DOMES, G., WINTER, B., SCHNELL, K., VOHS, K., FAST, K., AND HERPERTZ, S.C.                                                                                   | 1163 |
| <b>Theory of Mind (ToM) and counterfactual deficits in schizophrenia: misperception or misinterpretation?</b> LEITMAN, D.I., ZIWICH, R., PASTERNAK, R., AND JAVITT, D.C.                                                  | 1075 | <b>Behavioural and neuropsychological correlates of frontal lobe features in dementia</b> ENGELBORGH, S., MAERTENS, K., MARIËN, P., VLOEBERGH, E., SOMERS, N., NAGELS, G., AND DE DEYN, P.P.                                                               | 1173 |
| <b>Dissociable mechanisms for memory impairment in bipolar disorder and schizophrenia</b> GLAHN, D.C., BARRETT, J., BEARDEN, C.E., MINTZ, J., GREEN, M.F., MONKUL, E.S., NAJF, P., SOARES, J.C., AND VELLIGAN, D.I.       | 1085 | <b>Pre-morbid IQ and response to routine outcome assessment</b> SLADE, M., LEESE, M., GILLARD, M., KUIPERS, E., AND THORNICROFT, G.                                                                                                                        | 1183 |
| <b>Abnormal function of the brain system supporting motivated attention in medicated patients with schizophrenia: an fMRI study</b> LIDDLE, P.F., LAURENS, K.R., KIEHL, K.A., AND NGAN, E.T.C.                            | 1097 | <i>American Journal of Psychiatry</i><br>Contents April 2006                                                                                                                                                                                               | 1193 |
| <b>Reasoning under uncertainty: heuristic judgments in patients with persecutory delusions or depression</b> CORCORAN, R., CUMMINS, S., ROWSE, G., MOORE, R., BLACKWOOD, N., HOWARD, R., KINDERMAN, P., AND BENTALL, R.P. | 1109 |                                                                                                                                                                                                                                                            |      |

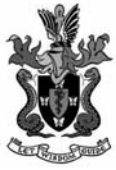

# THE BRITISH JOURNAL OF PSYCHIATRY

August 2006, VOL. 189

<http://bjp.rcpsych.org>

A4 Editorial Board

A5 Highlights of this issue

A6 Psychiatry in pictures

## EDITORIAL

97 **Contingency management treatments**  
N.M. Petry

## SPECIAL ARTICLE

99 **Scope for more genetic testing in learning disability. Case report of an inherited duplication on the X-chromosome**  
B.A. Robertshaw and J. MacPherson

## REVIEW ARTICLE

102 **Aripiprazole for schizophrenia. Systematic review**  
H.G. El-Sayeh, C. Morganti, and C.E. Adams

## PAPERS

109 **Socio-economic position and common mental disorders. Longitudinal study in the general population in the UK**  
P. Skapinakis, S. Weich, G. Lewis, N. Singleton, and R. Araya

118 **Sub-syndromal and syndromal symptoms in the longitudinal course of bipolar disorder**  
E.S. Paykel, R. Abbott, R. Morriss, H. Hayhurst, and J. Scott

124 **Mood switch in bipolar depression: comparison of adjunctive venlafaxine, bupropion and sertraline**  
R.M. Post, L.L. Altshuler, G.S. Leverich, M.A. Frye, W.A. Nolen, R.W. Kupka, T. Suppes, S. McElroy, P.E. Keck, K.D. Denicoff, H. Grunze, C.M.R. Kitchen, and J. Mintz

132 **Measuring memory impairment in community-based patients with schizophrenia. Case-control study**  
M.M. Al-Uzri, M.A. Reveley, L. Owen, J. Bruce, S. Frost, D. Mackintosh, and P.M. Moran

137 **Psychotic symptom and cannabis relapse in recent-onset psychosis. Prospective study**  
L. Hides, S. Dawe, D.J. Kavanagh, and R.McD. Young

144 **Risk factors for psychological and physical health problems after a man-made disaster. Prospective study**  
A.J.E. Dirkzwager, L. Grievink, P.G. van der Velden, and C.J. Yzermans

150 **Emotional or educational debriefing after psychological trauma. Randomised controlled trial**  
M. Sijbrandij, M. Olf, J.B. Reitsma, I.V.E. Carlier, and B.P.R. Gersons

156 **Three decades of antidepressant, anxiolytic and hypnotic use in a national population birth cohort**  
I. Colman, M.E.J. Wadsworth, T.J. Croudace, and P.B. Jones

161 **Health service use by adults with depression: community survey in five European countries. Evidence from the ODIN study**  
C. McCracken, O.S. Dalgard, J.L. Ayuso-Mateos, P. Casey, G. Wilkinson, V. Lehtinen, and C. Dowrick

168 **Gender differences in reoffending after discharge from medium-secure units. National cohort study in England and Wales**  
A. Maden, P. Skapinakis, G. Lewis, F. Scott, and E. Jamieson

173 **Psychological effects of ketamine in healthy volunteers. Phenomenological study**  
E. Pomarol-Clotet, G.D. Honey, G.K. Murray, P.R. Corlett, A.R. Absalom, M. Lee, P.J. McKenna, E.T. Bullmore, and P.C. Fletcher

## SHORT REPORTS

180 **Prosodic discrimination in patients with schizophrenia**  
K. Matsumoto, G.T. Samson, O.D.O'Daly, D.K. Tracy, A.D. Patel, and S.S. Shergill

182 **Psychiatric presentation of voltage-gated potassium channel antibody-associated encephalopathy. Case report**  
U.D. Parthasarathi, T. Harrower, M. Tempest, J.R. Hodges, C. Walsh, P.J. McKenna, and P.C. Fletcher

184 **Generic clozapine: outcomes after switching formulations**  
C. Paton

## COLUMNS

186 **Correspondence**

191 **One hundred years ago**

191 **Corrigendum**

192 **Book reviews**

198 **Contents of the *American Journal of Psychiatry***

199 **Contents of *Advances in Psychiatric Treatment***  
200 **From the Editor's desk**
